# Supplementary material
Source: ML conference proceedings conference paper supplement (https://openreview.net/forum?id=rySLejeB1k)
Supplement: supplementary_material [file attachment]

## Sheet: Sheet1
Species	Retina (mm^2)	V1 size (mm^2)	2D density of V1 neurons (neurons/mm^2)	Number of V1 pinwheels	RFs density of V1 ((c)x(d)/(b)) (RFs/mm^2)	Pinwheel density (pinwheels/mm^2)	Horizontal visual field of one retina (deg)	V1 neurons (Srinivasan, Carlo, & Stevens, 2015)	V1 RF size	V1 cortical magnification factor (CMF) (mm/deg)	RFs-V1neurons Ratio
Macaque	636	1090	243000	8720	416462	8	165-170 (Najafian et al., 2022; Heesy, 2004)	264870000	0.2-8 (Tehovnik & Slocum, 2007)	2-18.18 mm/deg (Tehovnik & Slocum, 2007)	1.71384
Ferret	83	78	95813	429	90041.1	5.5		7473414	3.0-20.0 (Huberman et al., 2006) (White et al., 1999)	0.4 mm/deg (Law et al., 1988; Hooser et al., 2005)	0.939759
Cat	510	380	99200	1140	73913.7	3	140-150 (Najafian et al., 2022; Heesy, 2004)	37696000	1.0-7.0 (Scholl, Burge, & Priebe, 2013)	0.67 mm/deg (Veit et al., 2014)	0.745098
Tree shrew	122	73	192800	564	115364	7.72603		14074400	2.0-12.0 (Veit et al., 2014)	0.22-0.25 mm/deg ( Hooser et al., 2005)	0.598361
Mouse	15	2.5	86600	N/A	14433.3	N/A	180-190 (Najafian et al., 2022; Heesy, 2004)	216500	4.0-16.0 (Niell & Stryker, 2008)	0.01 mm/deg (periphery), 0.02-0.03mm/deg (binocular zone) (van Beest et al. 2021)	0.166667
Gray squirrel	205	32	84213	N/A	13145.4	N/A		2694816	2.0-15.0 (Hall et al., 1971)	0.25-0.29 mm/deg (Hall et al., 1971)	0.156098
Rat	52	7.1	90800	N/A	12397.7	N/A		644680	3.0-50 (Foik et al., 2020)	0.04 mm/deg (Hooser et al., 2005)	0.136538
Najafian, S., Koch, E., Teh, K. L., Jin, J., Rahimi-Nasrabadi, H., Zaidi, Q., Kremkow, J., & Alonso, J.-M. (2022). A theory of cortical map formation in the visual brain. Nature Communications, 13(1), Article 1. https://doi.org/10.1038/s41467-022-29433-y
van Beest, E. H., Mukherjee, S., Kirchberger, L., Schnabel, U. H., van der Togt, C., Teeuwen, R. R. M., Barsegyan, A., Meyer, A. F., Poort, J., Roelfsema, P. R., & Self, M. W. (2021). Mouse visual cortex contains a region of enhanced spatial resolution. Nature Communications, 12(1), Article 1. https://doi.org/10.1038/s41467-021-24311-5
Tehovnik, E. J., & Slocum, W. M. (2007). Phosphene induction by microstimulation of macaque V1. Brain Research Reviews, 53(2), 337–343. https://doi.org/10.1016/j.brainresrev.2006.11.001
Niell, C. M., & Stryker, M. P. (2008). Highly Selective Receptive Fields in Mouse Visual Cortex. Journal of Neuroscience, 28(30), 7520–7536. https://doi.org/10.1523/JNEUROSCI.0623-08.2008
Tehovnik, E. J., & Slocum, W. M. (2007). Phosphene induction by microstimulation of macaque V1. Brain Research Reviews, 53(2), 337–343. https://doi.org/10.1016/j.brainresrev.2006.11.001
Veit, J., Bhattacharyya, A., Kretz, R., & Rainer, G. (2014). On the Relation Between Receptive Field Structure and Stimulus Selectivity in the Tree Shrew Primary Visual Cortex. Cerebral Cortex, 24(10), 2761–2771. https://doi.org/10.1093/cercor/bht133
Stepanyants, A., Martinez, L. M., Ferecskó, A. S., & Kisvárday, Z. F. (2009). The fractions of short- and long-range connections in the visual cortex. Proceedings of the National Academy of Sciences, 106(9), 3555–3560. https://doi.org/10.1073/pnas.0810390106
Scholl, B., Burge, J., & Priebe, N. J. (2013). Binocular integration and disparity selectivity in mouse primary visual cortex. Journal of Neurophysiology, 109(12), 3013–3024. https://doi.org/10.1152/jn.01021.2012
White, L. E., Bosking, W. H., Williams, S. M., & Fitzpatrick, D. (1999). Maps of Central Visual Space in Ferret V1 and V2 Lack Matching Inputs from the Two Eyes. Journal of Neuroscience, 19(16), 7089–7099. https://doi.org/10.1523/JNEUROSCI.19-16-07089.1999
Foik, A. T., Scholl, L. R., Lean, G. A., & Lyon, D. C. (2020). Visual Response Characteristics in Lateral and Medial Subdivisions of the Rat Pulvinar. Neuroscience, 441, 117–130. https://doi.org/10.1016/j.neuroscience.2020.06.030
Hall, W. C., Kaas, J. H., Killackey, H., & Diamond, I. T. (1971). Cortical visual areas in the grey squirrel (Sciurus carolinesis): A correlation between cortical evoked potential maps and architectonic subdivisions. Journal of Neurophysiology, 34(3), 437–452. c
Huberman, A. D., Speer, C. M., & Chapman, B. (2006). Spontaneous Retinal Activity Mediates Development of Ocular Dominance Columns and Binocular Receptive Fields in V1. Neuron, 52(2), 247–254. https://doi.org/10.1016/j.neuron.2006.07.028
