# Supplementary material
Source: ML conference proceedings conference paper supplement (https://openreview.net/forum?id=rySLejeB1k)
Supplement: supplementary_material [file attachment]

a

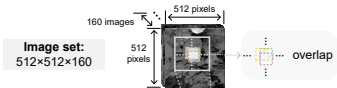

b

**Batch size:**  
100

c

**Excitatory and inhibitory neurons**

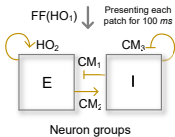

d

**Self-evolving spiking neural network**

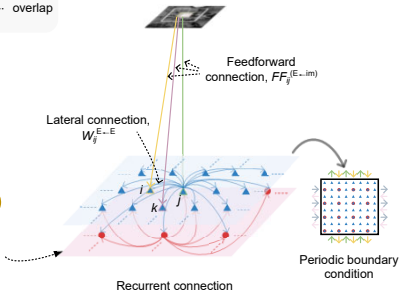

e

**Spatial self-organization**

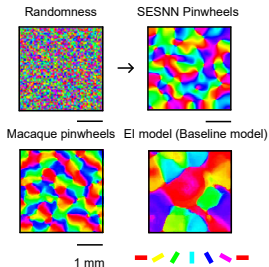

▲ E-neuron    → Excitatory connection    HO rule:  $FF^{(E \leftarrow im)}$  and  $W^{(E \leftarrow E)}$   
 ● I-neuron    → Inhibitory connection    CM rule:  $W^{(I \leftarrow E)}$ ,  $W^{(E \leftarrow I)}$ , and  $W^{(I \leftarrow I)}$
