# Supplementary material
Source: ML conference proceedings conference paper supplement (https://openreview.net/forum?id=rySLejeB1k)

**a**

## Orientation maps

Overlap = 9

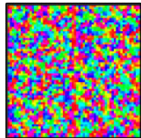Increase  
overlap  
→

Overlap = 13

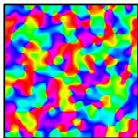

Overlap = 15

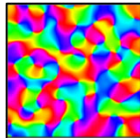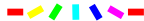

## Overlapping visual fields

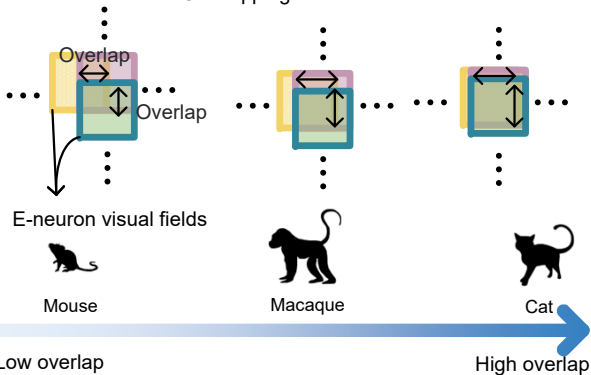**b**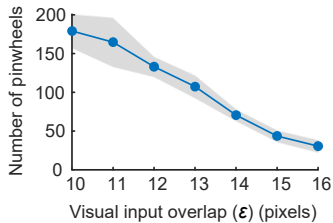**c**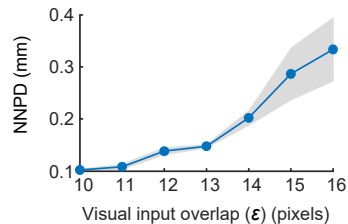**d**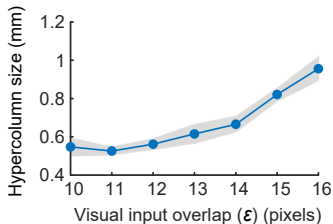**e**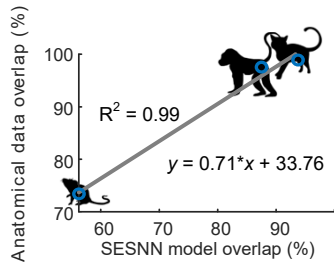

Supplement: supplementary_material [file attachment]

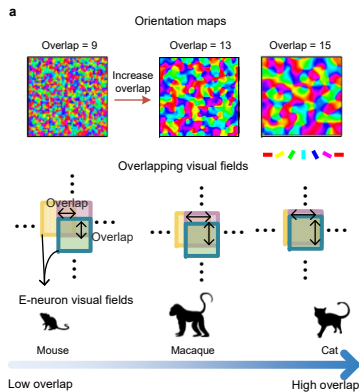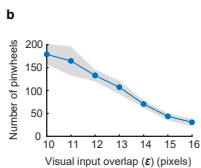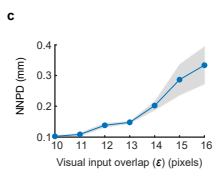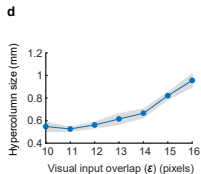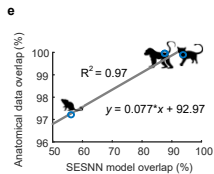

Supplement: supplementary_material [file attachment]

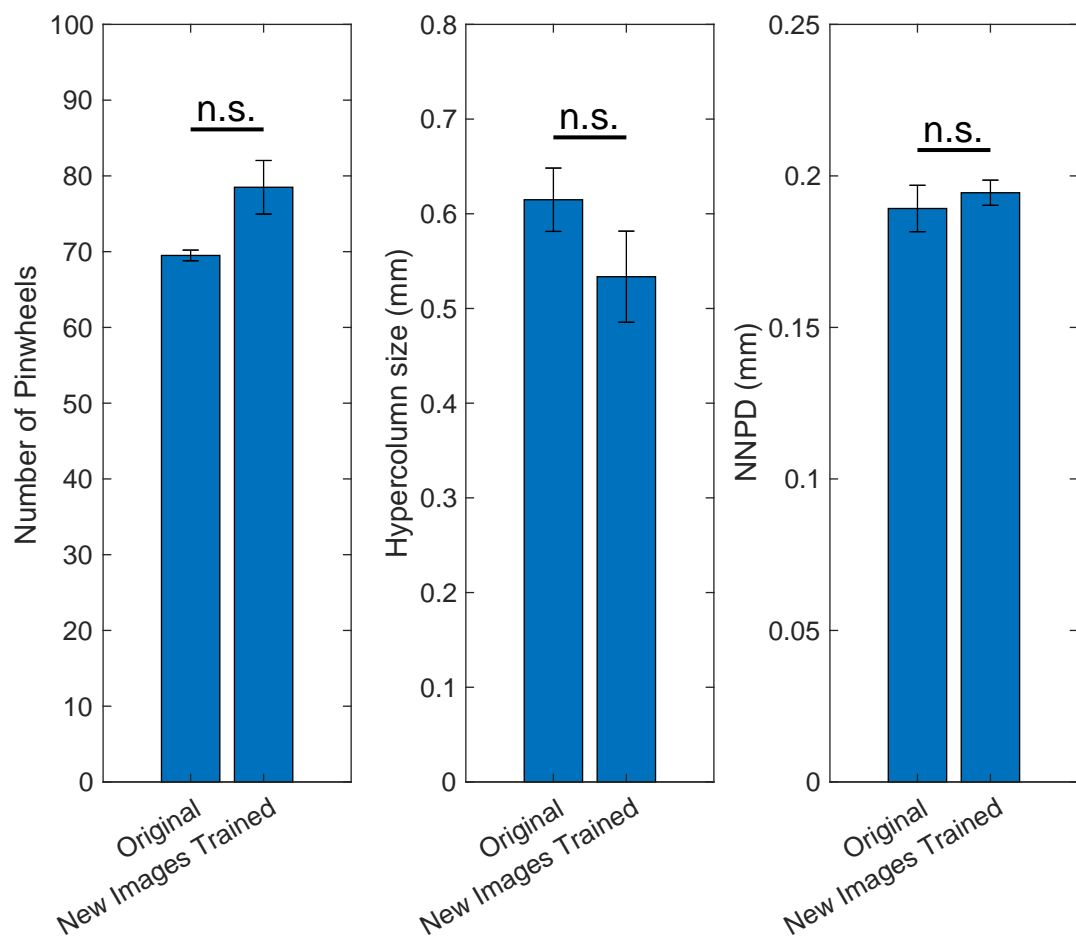

Supplement: supplementary_material [file attachment]

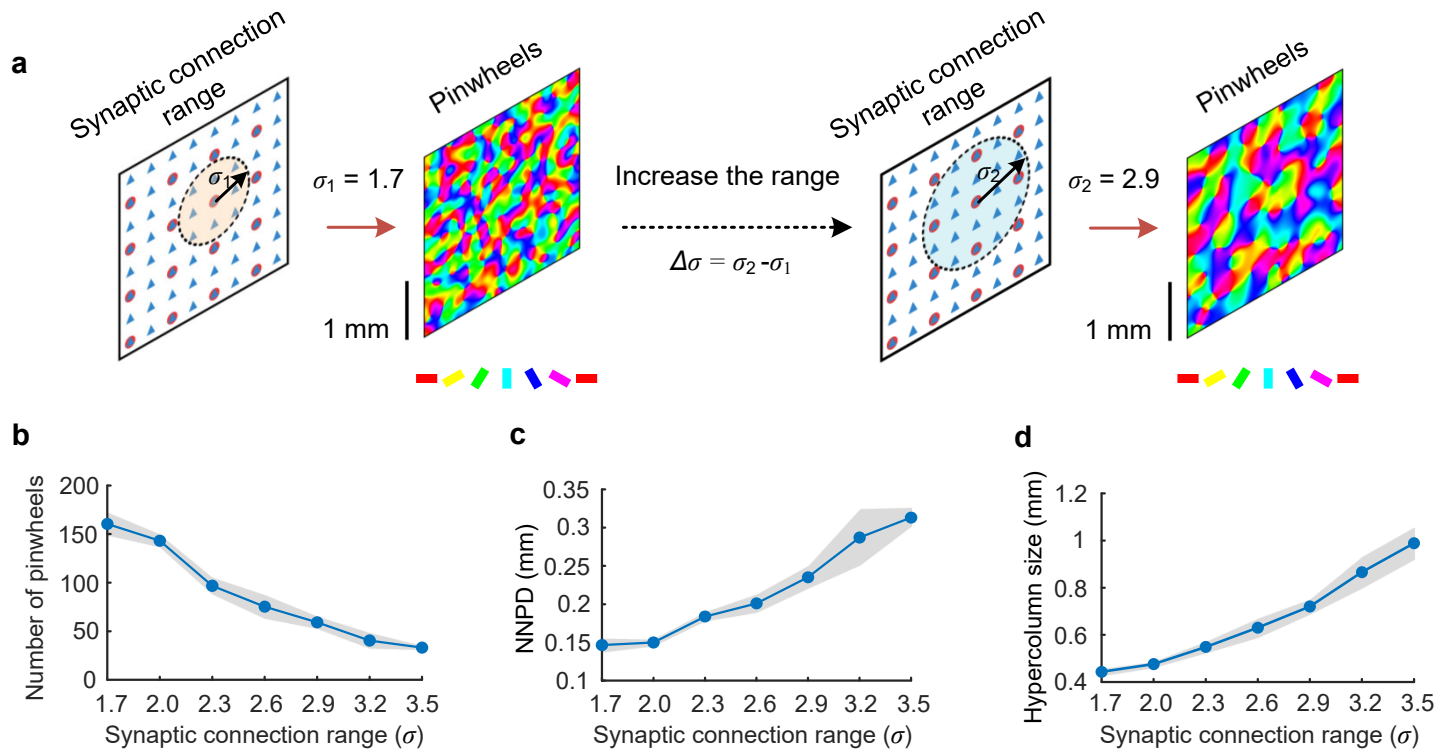

Supplement: supplementary_material [file attachment]

**a**

Stabilized Orientation Map    New Natural Images Trained Map

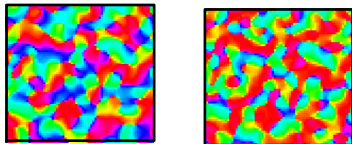**e**

Pairwise Cosine Similarity

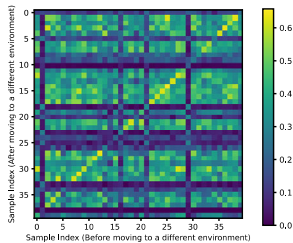**b**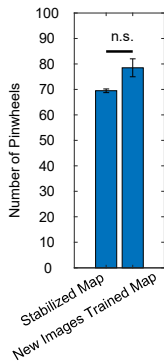**c**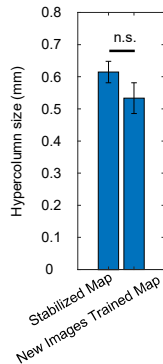**d**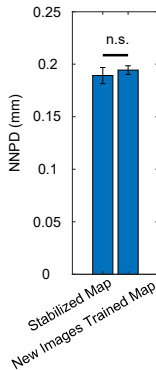

Supplement: supplementary_material [file attachment]

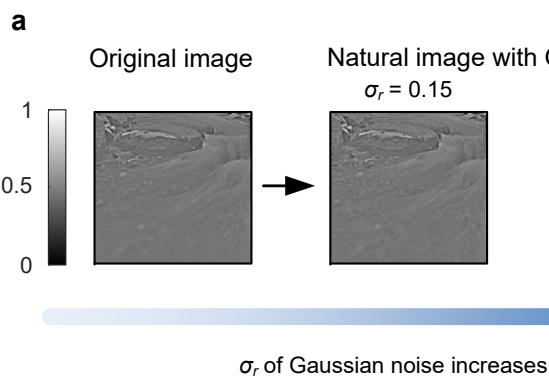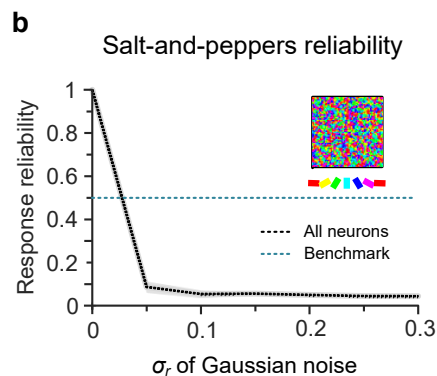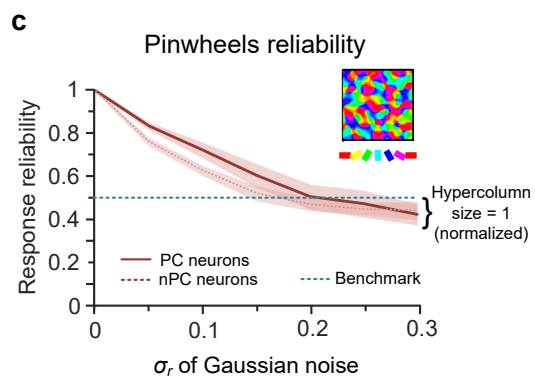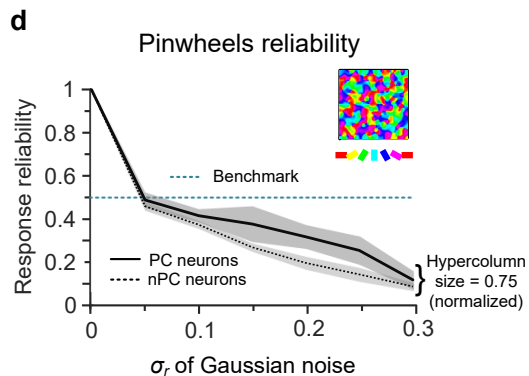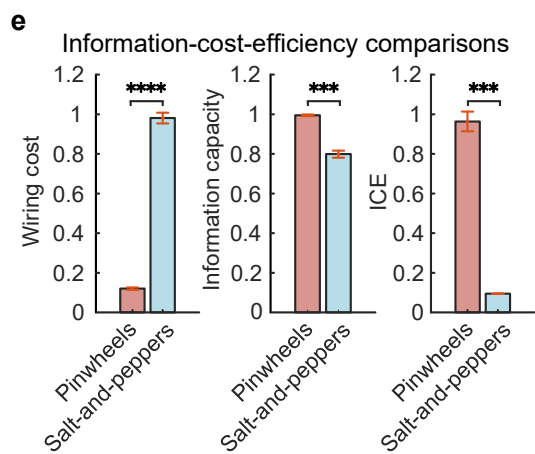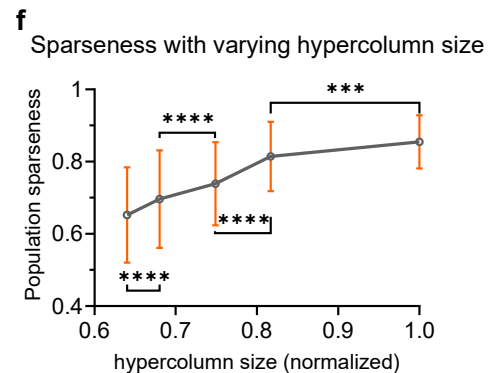

Supplement: supplementary_material [file attachment]

Original Orientation Map

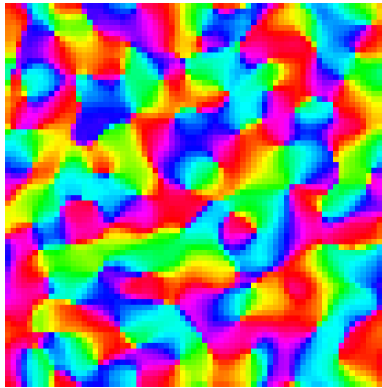

Orientation Map Trained with New Images

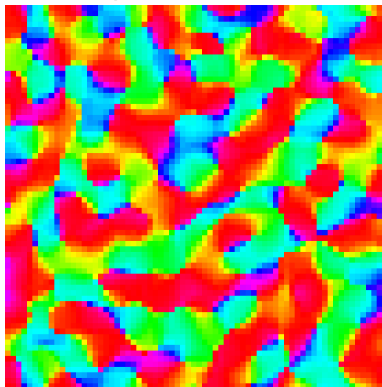

Supplement: supplementary_material [file attachment]

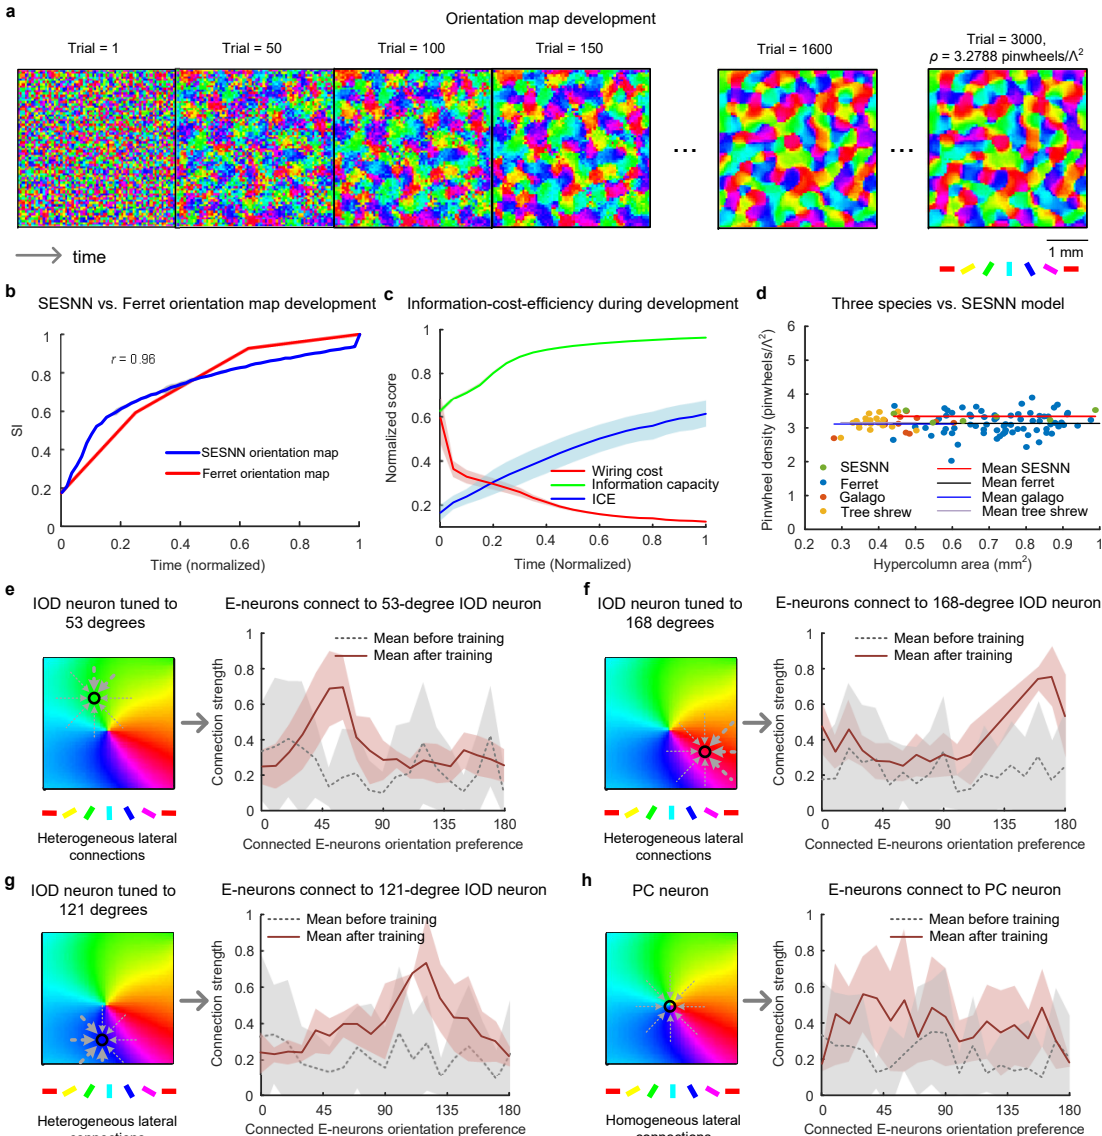

Supplement: supplementary_material [file attachment]
